## **Hypusinated eIF5A is expressed in pancreas and spleen of individuals with type 1 and type 2 diabetes**

Teresa L. Mastracci<sup>1,2\*</sup>, Stephanie C. Colvin<sup>3</sup>, Leah R. Padgett<sup>1</sup>, Raghavendra G. Mirmira<sup>3,4,5,6</sup>

<sup>1</sup> Indiana Biosciences Research Institute, Indianapolis, IN, USA

<sup>2</sup> Department of Biochemistry and Molecular Biology, Indiana University School of Medicine, USA

<sup>3</sup> Center for Diabetes and Metabolic Diseases, Indiana University School of Medicine, USA

<sup>4</sup> Department of Pediatrics, Indiana University School of Medicine, USA

<sup>5</sup> Department of Physiology, Indiana University School of Medicine, USA

<sup>6</sup> Herman B Wells Center for Pediatric Research, Indiana University School of Medicine, USA

**\*Corresponding author:** Dr. Teresa Mastracci, Indiana Biosciences Research Institute, 1345 W. 16<sup>th</sup> St., Suite 300, Indianapolis, IN USA 46202. Tel: 317-983-3357; Fax: 317-274-4107; Email: [tmastrac@iu.edu](mailto:tmastrac@iu.edu)

**Running Title:** Hypusinated eIF5A in the human pancreas

## ABSTRACT

Eukaryotic initiation factor 5A (*EIF5A*) is found in diabetes-susceptibility loci in mouse and human. eIF5A is the only protein known to contain hypusine (hydroxyputrescine lysine), a polyamine-derived amino acid formed post-translationally in a reaction catalyzed by deoxyhypusine synthase (DHPS). Previous studies showed pharmacologic blockade of DHPS in type 1 diabetic NOD mice and type 2 diabetic db/db mice improved glucose tolerance and preserved beta-cell mass, which suggests that hypusinated eIF5A (eIF5A<sup>Hyp</sup>) may play a role in diabetes pathogenesis by direct action on the beta cells and/or altering the adaptive or innate immune responses. To translate these findings to human, we examined tissue from individuals with and without type 1 and type 2 diabetes to determine the expression of eIF5A<sup>Hyp</sup>. We detected eIF5A<sup>Hyp</sup> in beta cells, exocrine cells and immune cells; however, there was also unexpected enrichment of eIF5A<sup>Hyp</sup> in pancreatic polypeptide-expressing PP cells. Interestingly, the presence of eIF5A<sup>Hyp</sup> co-expressing PP cells was not enhanced with disease. These data identify new aspects of eIF5A biology and highlight the need to examine human tissue to understand disease.

**Keywords:** eIF5A/Hypusine/Hypusination/PP cells/human islets

## 1 INTRODUCTION

2           The mechanisms underlying the pathogenesises of type 1 diabetes (T1D) and type  
3 2 diabetes (T2D) involve the activation of systemic and local inflammatory pathways,  
4 leading to eventual dysfunction, de-differentiation and/or death of the beta cells in the  
5 pancreatic islet. Elucidating the molecular mechanisms driving the inflammatory  
6 response is applicable to the development of therapies for both diseases. In addition, an  
7 urgent priority in T1D research is the discovery of biomarkers that can assist in the  
8 identification of individuals with pre-clinical disease so early preventative therapeutic  
9 interventions can be implemented.

10           Recently, our laboratories have been investigating the involvement of the  
11 hypusinated form of eukaryotic initiation factor 5A (eIF5A) in the development and  
12 progression of diabetes in mice. To date, eIF5A is the only known protein to contain  
13 hypusine (hydroxyputrescine lysine) [1], which is a polyamine-derived amino acid. This  
14 post-translational modification, formed by the process of “hypusination” [2], is catalyzed  
15 through a multi-step reaction initiated by the *rate-limiting* enzyme deoxyhypusine  
16 synthase (DHPS) and uses the polyamine spermidine as a cofactor to modify the Lys50  
17 of eIF5A [2]. Previous studies using human cell lines and yeast determined that eIF5A,  
18 the hypusinated form of eIF5A (eIF5A<sup>Hyp</sup>) and DHPS are vital for cell viability and  
19 proliferation [3,4]. Evolutionarily, eIF5A is highly conserved including the amino acid  
20 sequence surrounding the hypusine residue, which suggests an important role for this  
21 modification [5]. Whereas studies across species have established that eIF5A<sup>Hyp</sup>  
22 efficiently binds the ribosome complex and facilitates mRNA translation [3,6,7], the exact  
23 function of eIF5A and eIF5A<sup>Hyp</sup> remains unknown..

24           Interestingly, the gene encoding eIF5A is found in the *Idd4* diabetes-susceptibility  
25 locus in non-obese diabetes (NOD) mice [8,9]. In prior studies, we showed that eIF5A<sup>Hyp</sup>  
26 is responsible for the translation of a subset of cytokine-induced transcripts in beta cells

27 in mouse models of diabetes [10,11], and that eIF5A<sup>Hyp</sup> also appears to be required for  
28 the activation and proliferation of effector T helper cells [12]. Moreover, reducing the  
29 hypusination of eIF5A in NOD mice, a model of T1D, by pharmacological inhibition of  
30 DHPS resulted in reduced insulinitis, improved glucose tolerance and preserved beta cell  
31 mass [12]. Similarly, pharmacological blockade of DHPS in db/db mice [13], a model of  
32 T2D improved glucose tolerance and enhanced beta cell mass [14]. Together these data  
33 suggest that eIF5A<sup>Hyp</sup> may play a critical role in the pathogenesis of diabetes and  
34 altering the expression of eIF5A<sup>Hyp</sup> may improve diabetes outcomes long-term.

35 To translate these findings to human, a greater understanding of eIF5A<sup>Hyp</sup> in the  
36 human pancreas and spleen would be required. In particular, determining the expression  
37 pattern of eIF5A<sup>Hyp</sup> in human and whether eIF5A<sup>Hyp</sup>-expressing cells stratify with  
38 characteristics of disease would be informative. In this study, we used human donor  
39 tissue samples from the Network of Pancreatic Organ Donors with Diabetes (nPOD)  
40 ([www.jdrfnpod.org](http://www.jdrfnpod.org)) to examine the cell-type distribution of eIF5A<sup>Hyp</sup> in the human  
41 pancreas and spleen from individuals with T1D, T2D and non-diabetic controls.

42

43

44

## 45 **RESULTS**

### 46 *Beta cell and non-beta cell distribution of eIF5A<sup>Hyp</sup> in mouse*

47 We previously developed and characterized a novel antibody that recognizes the  
48 unique amino acid hypusine, formed exclusively through posttranslational modification of  
49 the Lys50 residue of eIF5A (eIF5A<sup>Hyp</sup>) [10]. In this study, we utilized this antibody to  
50 investigate the expression of eIF5A<sup>Hyp</sup> in mouse and human pancreas tissue and  
51 isolated islets as well as human spleen tissue, to characterize the expression pattern of  
52 eIF5A<sup>Hyp</sup> and determine if eIF5A<sup>Hyp</sup>-expressing cells stratify with characteristics of

53 disease. To that end, we first confirmed the presence of eIF5A<sup>Hyp</sup> in islets isolated from  
54 mouse and human pancreas as well as in mouse pancreas and human acinar (exocrine)  
55 tissue (Fig 1A).

56 We next utilized the *RIP-cre;R26R<sup>Tomato</sup>* mouse model wherein the insulin-  
57 expressing cells were labeled with a lineage trace, thereby generating beta cells indelibly  
58 marked with fluorescent reporter (tomato) expression. Islet cells from *RIP-cre;R26R<sup>Tomato</sup>*  
59 and control animals were sorted by FACS, using the presence and absence of tomato  
60 expression to separate cells into two populations: beta cells (tomato-positive) and non-  
61 beta cells (tomato-negative). The cell types represented in the “non-beta cell” sample  
62 would include (ordered from largest population to smallest): glucagon-expressing alpha  
63 cells, somatostatin-expressing delta cells, pancreatic polypeptide-expressing PP cells,  
64 ghrelin-expressing epsilon cells, exocrine cells (a possible contaminant from the process  
65 of islet isolation) and support cells including endothelial cells. A similar quantity of  
66 tomato-positive beta cells ( $1.92 \times 10^5$  cells) and tomato-negative non-beta cells ( $2.13 \times 10^5$   
67 cells) were collected (Fig EV1). Subsequent western blot analysis identified that eIF5A<sup>Hyp</sup>  
68 was present in nearly identical abundance in both the beta cell (tomato-positive) and  
69 non-beta cell (tomato-negative) populations (Fig 1B). The expression of Pdx1 confirms  
70 the enrichment of beta cells in the tomato positive cells; the lower level of Pdx1  
71 expression in the non-beta cell fraction can be attributed to the somatostatin-expressing  
72 delta cells. These data demonstrate that eIF5A<sup>Hyp</sup> is expressed in both the beta cell and  
73 non-beta cell fractions; however, the specific non-beta cell type(s) expressing eIF5A<sup>Hyp</sup>  
74 cannot be clarified from these data. Therefore, to characterize the spatial distribution of  
75 eIF5A<sup>Hyp</sup> expression pattern in the islet, we performed co-immunofluorescence staining  
76 for eIF5A<sup>Hyp</sup> and islet hormones in mouse pancreas tissue. Whereas relatively weak  
77 immunostaining of eIF5A<sup>Hyp</sup> was found throughout the pancreas and islets, robust  
78 immunostaining of eIF5A<sup>Hyp</sup> was found in the islet cell population that expressed

79 pancreatic polypeptide (Fig 1C, D). Based on the known abundance of islet cell  
80 populations [15–17], PP cells would represent only a small proportion of the “tomato-  
81 negative non-beta cell” FACS sample, yet the abundance of eIF5A<sup>Hyp</sup> expression is  
82 nearly equivalent to that observed in the pure “tomato-positive beta cell” FACS sample  
83 (Fig 1B). Thus, the robust expression of eIF5A<sup>Hyp</sup> in the PP cells is consistent with the  
84 immunoblot data.

85

### 86 *eIF5A<sup>Hyp</sup>-expressing cells in the pancreas of human type 2 diabetes*

87 To characterize the expression pattern of eIF5A<sup>Hyp</sup> in the human pancreas, we  
88 utilized tissue samples from the Network of Pancreatic Organ Donors with Diabetes  
89 (nPOD). A cohort of tissues from donors with and without T2D were provided (Table 1).  
90 Both pancreas and spleen tissues were acquired from each donor; age, gender, ethnicity  
91 and BMI were matched where possible. Given the relatively small size of the cohort,  
92 quantitative evaluations were not possible. Therefore, we evaluated the presence or  
93 absence of eIF5A<sup>Hyp</sup>, its cell-type expression pattern, and its expression correlation with  
94 disease.

95 Pancreas tissue sections were co-immunostained with the eIF5A<sup>Hyp</sup>-specific  
96 antibody and antibodies that recognized the hormones expressed by each of the  
97 endocrine cell populations in the islet (insulin, glucagon, somatostatin, ghrelin and  
98 pancreatic polypeptide). Co-localization was not observed between eIF5A<sup>Hyp</sup> and insulin  
99 (Fig 2A,B), glucagon (Fig 2C,D), ghrelin (Fig 2E,F), or somatostatin (Fig 2G,H).  
100 However, as observed in the mouse pancreas, cells expressing pancreatic polypeptide  
101 were identified to co-express high levels of eIF5A<sup>Hyp</sup> in control pancreas tissue (Fig 3A).  
102 These cells also expressed chromograninA, which confirms their identity as  
103 neuroendocrine cells (Fig 3B). The co-localization of eIF5A<sup>Hyp</sup> with pancreatic  
104 polypeptide in the PP-expressing cells was observed in pancreas tissues from donors

105 with T2D (Fig 3C,D) and non-diabetic controls, suggesting no stratification with disease.  
106 Notably, whereas PP and eIF5A<sup>Hyp</sup> were expressed in the same cells, the expression  
107 pattern reveals localization in different compartments, with the eIF5A<sup>Hyp</sup> pattern  
108 suggestive of localization in the endoplasmic reticulum (Fig 3E).

109 Spleen tissue sections from the same donors were co-immunostained with  
110 eIF5A<sup>Hyp</sup> and markers of various cell types. In particular, Pax5-expressing B cells, CD4-  
111 expressing T cells, and CD8-expressing T cells were evaluated for co-expression of  
112 eIF5A<sup>Hyp</sup>. Whereas most Pax5+ B cells expressed eIF5A<sup>Hyp</sup>, a select group of eIF5A<sup>Hyp</sup>-  
113 expressing cells co-expressed either CD4 or CD8 (Fig 4A-C). No differences in staining  
114 intensity or distribution were observed between samples from T2D and controls (Fig 4D-  
115 E).

116

#### 117 *eIF5A<sup>Hyp</sup>-expressing cells in the pancreas of human type 1 diabetes*

118 Donor pancreas and spleen tissue from individuals with T1D were also acquired  
119 from nPOD and evaluated for eIF5A<sup>Hyp</sup> expression. This cohort of samples included T1D  
120 donors that were autoantibody-positive and autoantibody-negative, with both short and  
121 long disease duration; non-diabetic controls were matched for age, gender, ethnicity and  
122 BMI (Table 2). Similar to the T2D/control samples, we identified cells co-expressing the  
123 hormone PP with high intensity eIF5A<sup>Hyp</sup> immunostaining (Fig 5A-F); co-expression of  
124 eIF5A<sup>Hyp</sup> with other islet hormones was not observed. Moreover, the eIF5A<sup>Hyp</sup>-  
125 expressing cells expressed ChromograninA (Fig 5 G-I), which again confirmed that  
126 these cells are neuroendocrine in nature. Evaluation of spleen tissue for all T1D donors  
127 and controls revealed an identical pattern of expression to that observed in the T2D  
128 donors and controls. Specifically, the majority of eIF5A<sup>Hyp</sup>-expressing cells co-expressed  
129 Pax5 (Fig 6).

130

131

## 132 **DISCUSSION**

133 Previous data from mouse models identified that pharmacological modulation of  
134 the hypusination of eIF5A enhanced beta cell mass and improved glucose tolerance in  
135 mouse models of both T1D and T2D [12,14], thereby suggesting an important role for  
136 eIF5A<sup>Hyp</sup> in the setting of diabetes. However, to translate these findings to human, a  
137 greater understanding of eIF5A<sup>Hyp</sup> in the human pancreas and spleen would be required.  
138 This study represents the first description of eIF5A<sup>Hyp</sup> expression in human organs from  
139 donors with and without diabetes. Importantly, our results reveal a heretofore  
140 unappreciated cell-specific enrichment of eIF5A<sup>Hyp</sup> in subsets of endocrine cells in the  
141 pancreas and immune cells in the spleen. Moreover, the presence of eIF5A<sup>Hyp</sup> co-  
142 expressing cells was not enhanced in diseased tissue; however, larger cohorts are  
143 required to quantitate the presence of these cells and definitively determine correlation  
144 with disease.

145 Our findings in the pancreas demonstrate that eIF5A<sup>Hyp</sup> is expressed in both the  
146 exocrine and endocrine compartments in mouse and human. Strikingly, the  
147 immunostaining analysis revealed that the PP cell population exhibited the most robust  
148 immunostaining for eIF5A<sup>Hyp</sup>. Given the over-representation of PP cells in the uncinate  
149 region of the pancreas [17], we specifically analyzed tissue sections that contained the  
150 uncinate region and found that, regardless of location, PP cells co-expressed eIF5A<sup>Hyp</sup>.  
151 Despite evidence that PP cells have a critical secretory function in the brain-gut axis [18]  
152 and may serve as a regulator of intra-islet secretion [19], the role of PP cells in the  
153 context of diabetes has received little attention. From a developmental perspective, PP  
154 cells are predominantly derived from the ghrelin-expressing cell lineage found in the  
155 embryonic pancreas [20]; however, the function of eIF5A<sup>Hyp</sup> in the PP cell population  
156 postnatally or any function for eIF5A<sup>Hyp</sup> in the development of PP cells has yet to be



157 elucidated. Interestingly, expression analysis of 12-lipoxygenase, a factor known to  
158 promote inflammation in the setting of diabetes, is also increased in the PP-expressing  
159 cell population in pancreas tissue from human donors (collected through nPOD; [21]).  
160 Clearly, a greater understanding is required for the role of PP cells in the pathogenesis  
161 of diabetes.

162         Given that much of the published and ongoing work on hypusine biosynthesis in  
163 mice has studied eIF5A<sup>Hyp</sup> in the context of diabetes, we had hypothesized that eIF5A<sup>Hyp</sup>  
164 expression would be identified predominantly in the insulin-producing beta cell  
165 population. Our western blot analysis did reveal eIF5A<sup>Hyp</sup> expression in human islets.  
166 Moreover, we observed eIF5A<sup>Hyp</sup> expression in a purified population of beta cells  
167 (tomato+) from mouse islets. Interestingly, the quantitative nature of western blots  
168 indicates that the expression of eIF5A<sup>Hyp</sup> must be lower in the purified beta cells  
169 compared with non-beta cells given that PP cells are only a small portion of the tomato(-)  
170 non-beta cell fraction whereas the tomato(+) fraction is composed exclusively of beta  
171 cells, and we see near equivalent expression of eIF5A<sup>Hyp</sup> in both sorted populations. This  
172 finding is consistent with the unexpected immunofluorescence data, wherein we  
173 identified robust expression of eIF5A<sup>Hyp</sup> in PP-expressing cells. Therefore, together  
174 these data support the conclusion that eIF5A<sup>Hyp</sup> is expressed at a lower level in beta  
175 cells compared with the PP cell population.

176         Our previous finding that pharmacological inhibition of eIF5A hypusination (using  
177 the drug GC7) in non-obese diabetic (NOD) mice improved glucose tolerance and  
178 preserved beta cell mass [12]. These improvements were also accompanied by  
179 reductions in insulinitis, which led us to question whether the improvements in beta cell  
180 function were due to a direct effect of DHPS inhibition in beta cells, or an indirect effect  
181 related to DHPS inhibition in infiltrating immune cells. Our work and that of others  
182 suggest a role for eIF5A<sup>Hyp</sup> and DHPS in promoting T cell and B cell proliferation

183 [12,22,23], which was the basis for our hypothesis that perhaps eIF5A<sup>Hyp</sup> is differentially  
184 expressed in immune cells in individuals with diabetes compared with controls. However,  
185 identical expression patterns and abundance was noted in all spleen tissue evaluated.  
186 Given our recent findings that deletion of *Dhps* in adult mouse beta cells impacts diet-  
187 induced beta cell proliferation (Lavasasseur E. et al., *in submission*), we are now  
188 investigating eIF5A<sup>Hyp</sup> expression in other proliferating cell populations as well as  
189 diabetes-induced inflammation.

190

191

192

## 193 **MATERIALS AND METHODS**

### 194 *Pancreas and isolated islet cells from mouse*

195 All mice were purchased from the Jackson Laboratory and maintained under a  
196 protocol approved by the Indiana University School of Medicine Institutional Animal Care  
197 and Use Committee. Total pancreas and isolated islets from wildtype C57BL/6 mice as  
198 well as acinar tissue and isolated islets from human donors (Table 3 details human  
199 donors) were subjected to immunoblot analysis as previously described [24]. Rabbit anti-  
200 eIF5A<sup>Hyp</sup> ([11]; 1:1000), mouse anti-eIF5A (BD Biosciences; 1:2000) and guinea pig anti-  
201 insulin (DAKO; 1:5000) antibodies were used to confirm protein expression in the  
202 pancreas.

203 Mice containing the *RIP-cre* allele (B6.CG-Tg(Ins2-cre)25Mgn/J) [25] were mated  
204 with those containing the *R26R<sup>Tomato</sup>* allele (B6.Cg-Gt(ROSA)26Sor<sup>tm14(CAG-tdTomato)Hze/J</sup>)  
205 [26] to produce double transgenic animals wherein all the pancreatic insulin-producing  
206 beta cells in the pancreas expressed a fluorescent (Tomato) reporter. Pancreatic islets  
207 were isolated from *RIP-cre;R26R<sup>Tomato</sup>* mice and *R26R<sup>Tomato</sup>* mice as previously described  
208 [27]. The isolated islets from all mice were pooled together and processed for

209 fluorescence activated cell sorting (FACS), which facilitated the separation of islet cells  
210 into two populations: tomato-positive beta cells and tomato-negative non-beta cells (islet  
211 cells expressing glucagon, somatostatin, ghrelin, and pancreatic polypeptide). Pooled  
212 islets were washed with sterile PBS (Fisher Scientific) and incubated in Accutase cell  
213 detachment solution (Sigma) for 10 minutes at 37C with constant mixing (1000 rpm).  
214 Islet cells were removed from the Accutase solution by centrifugation (500 x g for 1 min)  
215 and resuspended in cold buffer containing 2% BSA, 1uM EDTA, and equal parts PBS  
216 and HBSS (Fisher Scientific). The cells were filtered, collected and incubated with APC  
217 viability dye (Zombie NIR-IR dye; BioLegend) per the manufacturer's recommended  
218 protocol. Single-cell suspensions from *RIP-cre;R26R<sup>Tomato</sup>* mice and *R26R<sup>Tomato</sup>* were  
219 then sorted using an iCyt Reflection with 100 µm nozzle at 23 psi. Dead cells (NIR-IR+)  
220 were excluded; tomato(+) cells and tomato(-) cells were collected into tubes containing  
221 sort buffer. Data were analyzed using FlowJo software (Tree Star). Lysates from the two  
222 populations of cells were subjected to immunoblot analysis. Rabbit anti-eIF5A<sup>Hyp</sup> and  
223 mouse anti-eIF5A antibodies were used as above, to evaluate the abundance of  
224 eIF5A<sup>Hyp</sup> in the beta cell and non-beta cell populations. Rabbit anti-Pdx1 (Chemicon;  
225 1:1000) antibody was used to evaluate enrichment of the beta cell (tomato+) population.

226

#### 227 *Mouse pancreas tissue and immunofluorescence analysis*

228 Pancreas tissue was harvested from wildtype C57BL/6 mice and fixed in 4%  
229 paraformaldehyde (Fisher Scientific), cryo-preserved using 30% sucrose, embedded in  
230 OCT (Fisher Scientific) and sectioned onto glass microscope slides. Methods previously  
231 described for pancreas preservation and immunofluorescence were followed [28].  
232 Pancreas tissue sections (8 µm) were stained using the following primary antibodies:  
233 guinea pig anti-insulin (DAKO; 1:500), goat anti-pancreatic polypeptide (abcam; 1:200),  
234 rabbit anti-eIF5A<sup>Hyp</sup> ([11]; 1:1000). Secondary antibodies including Alexa-488, Cy3, or

235 Alexa-647 (Jackson ImmunoResearch) were used, followed by DAPI (Sigma) to visualize  
236 nuclei. Images were acquired with a Zeiss 710 confocal microscope.

237

#### 238 *Human pancreas and spleen tissue*

239 Paraffin-embedded tissue sections were obtained from the nPOD consortium  
240 ([www.jdrfnpod.org](http://www.jdrfnpod.org)). A total of 10 nondiabetic donors, 4 donors with T2D, and 12 donors  
241 with T1D (6 autoantibody positive, 6 autoantibody negative) were included in this study  
242 (Table 1 and Table 2). Information regarding donors' demography, histology, and  
243 disease status were provided by nPOD. The status of autoantibodies was also  
244 determined by nPOD as previously described [29].

245

#### 246 *Immunofluorescence analysis of human tissues*

247 Immunofluorescent staining was performed as previously published [28] with  
248 modifications to account for the use of paraffin embedded tissue. Briefly, tissue sections  
249 were deparaffinized through graded ethanols (100%, 95%, 85%, 75%, 50%; Fisher  
250 Scientific) and then blocked using normal donkey serum (Sigma). Primary antibodies  
251 used included guinea pig anti-insulin (DAKO; 1:500), mouse anti-glucagon (Abcam;  
252 1:500), rat anti-somatostatin (abcam; 1:200), goat anti-pancreatic polypeptide (abcam;  
253 1:200), goat anti-ghrelin (Santa Cruz; 1:500), mouse anti-Pax5 (DAKO; 1:200), mouse  
254 anti-CD8 (Thermo Fisher; 1:500), mouse anti-CD4 (Leica; 1:500). Secondary antibodies  
255 including Alexa-488, Cy3, or Alexa-647 (Jackson ImmunoResearch) were used to  
256 visualize primary antibodies. DAPI (Sigma) was used to visualize nuclei. Images were  
257 acquired with a Zeiss 710 confocal microscope.

258

259

260

261 **ACKNOWLEDGEMENTS**

262 The authors wish to thank Dr. David Morris and the Flow Cytometry Core Facility at  
263 Indiana University School of Medicine for assistance with FACS. Human pancreatic  
264 islets were provided by the NIDDK-funded Integrated Islet Distribution Program (IIDP) at  
265 City of Hope, NIH Grant # 2UC4DK098085. Human donor acinar tissue was provided by  
266 Dr. Rita Bottino at the Center for Organ Recovery and Education (CORE), Pittsburg PA.  
267 This work was supported by a JDRF Career Development Award (5-CDA-2016-194-A-N)  
268 to TLM, NIH R01 DK60581 to RGM, and a JDRF award to RGM. This research was also  
269 performed with the support of the Network for Pancreatic Organ donors with Diabetes  
270 (nPOD; RRID:SCR\_014641), a collaborative type 1 diabetes research project sponsored  
271 by JDRF (nPOD: 5-SRA-2018-557-Q-R) and The Leona M. & Harry B. Helmsley  
272 Charitable Trust (Grant#2018PG-T1D053). Organ Procurement Organizations (OPO)  
273 partnering with nPOD to provide research resources are listed at  
274 <http://www.jdrfnpod.org//for-partners/npod-partners/>.

275

276 **AUTHOR CONTRIBUTIONS**

277 TLM, RGM designed research; TLM, SCC, LRP performed research; TLM, SCC, LRP,  
278 RGM analyzed data; TLM, RGM wrote the manuscript; all authors edited and approved  
279 the final draft of the manuscript.

280

281 **CONFLICT OF INTEREST**

282 The authors declare they have no conflict of interest.

283

284

285

286

287 **THE PAPER EXPLAINED**

288 **Problem:** Previous studies in mouse models of type 1 and type 2 diabetes showed that  
289 reducing the hypusinated form eIF5A (eIF5A<sup>Hyp</sup>) resulted in improved glucose tolerance  
290 and preserved or enhanced beta cell mass. These findings suggests that eIF5A<sup>Hyp</sup> may  
291 play a critical role in the pathogenesis of diabetes by acting directly on the beta cells  
292 and/or altering the adaptive or innate immune responses. Examining tissues from  
293 individuals with and without type 1 and type 2 diabetes to determine the expression  
294 pattern of eIF5A<sup>Hyp</sup> and stratification with disease will provide insight into the relevance  
295 of eIF5A<sup>Hyp</sup> in the human disease setting.

296 **Results:** As expected, we identified expression of eIF5A<sup>Hyp</sup> in the beta cells and  
297 exocrine cells in the pancreas as well as immune cells in the spleen; however, there was  
298 an unexpected cell-specific enrichment of eIF5A<sup>Hyp</sup> in the pancreatic polypeptide-  
299 expressing PP cells in the pancreas. Moreover, the presence of eIF5A<sup>Hyp</sup> co-expressing  
300 PP cells was not apparently altered with disease.

301 **Impact:** Our data highlights new aspects of eIF5A biology and identified robust  
302 expression of eIF5A<sup>Hyp</sup> in the PP cells of the pancreas.

303

304

305

306

307

308

309

310

311

312

## 313 REFERENCES

- 314 1. Park MH, Cooper HL, Folk JE (1981) Identification of hypusine, an unusual amino  
315 acid, in a protein from human lymphocytes and of spermidine as its biosynthetic  
316 precursor. *Proc Natl Acad Sci U S A* **78**: 2869–2873.
- 317 2. Park MH (2006) The post-translational synthesis of a polyamine-derived amino acid,  
318 hypusine, in the eukaryotic translation initiation factor 5A (eIF5A). *J Biochem* **139**:  
319 161–169.
- 320 3. Saini P, Eyler DE, Green R, Dever TE (2009) Hypusine-containing protein eIF5A  
321 promotes translation elongation. *Nature* **459**: 118–121.
- 322 4. Park MH, Wolff EC, Lee YB, Folk JE (1994) Antiproliferative effects of inhibitors of  
323 deoxyhypusine synthase. Inhibition of growth of Chinese hamster ovary cells by  
324 guanyl diamines. *J Biol Chem* **269**: 27827–27832.
- 325 5. Wolff EC, Kang KR, Kim YS, Park MH (2007) Posttranslational synthesis of  
326 hypusine: evolutionary progression and specificity of the hypusine modification.  
327 *Amino Acids* **33**: 341–350.
- 328 6. Schuller AP, Wu CC-C, Dever TE, Buskirk AR, Green R (2017) eIF5A Functions  
329 Globally in Translation Elongation and Termination. *Mol Cell* **66**: 194-205.e5.
- 330 7. Gutierrez E, Shin BS, Woolstenhulme CJ, Kim JR, Saini P, Buskirk AR, Dever TE  
331 (2013) eIF5A promotes translation of polyproline motifs. *Mol Cell* **51**: 35–45.
- 332 8. McDuffie M, Maybee NA, Keller SR, Stevens BK, Garmey JC, Morris MA, Kropf E,  
333 Rival C, Ma K, Carter JD, et al. (2008) Nonobese diabetic (NOD) mice congenic for  
334 a targeted deletion of 12/15-lipoxygenase are protected from autoimmune diabetes.  
335 *Diabetes* **57**: 199–208.
- 336 9. Serreze DV, Chapman HD, Varnum DS, Gerling I, Leiter EH, Shultz LD (1997)  
337 Initiation of autoimmune diabetes in NOD/Lt mice is MHC class I-dependent. *J*  
338 *Immunol Baltim Md 1950* **158**: 3978–3986.
- 339 10. Maier B, Ogihara T, Trace AP, Tersey SA, Robbins RD, Chakrabarti SK, Nunemaker  
340 CS, Stull ND, Taylor CA, Thompson JE, et al. (2010) The unique hypusine  
341 modification of eIF5A promotes islet beta cell inflammation and dysfunction in mice.  
342 *J Clin Invest* **120**: 2156–2170.
- 343 11. Maier B, Tersey SA, Mirmira RG (2010) Hypusine: a new target for therapeutic  
344 intervention in diabetic inflammation. *Discov Med* **10**: 18–23.
- 345 12. Colvin SC, Maier B, Morris DL, Tersey SA, Mirmira RG (2013) Deoxyhypusine  
346 synthase promotes differentiation and proliferation of T helper type 1 (Th1) cells in  
347 autoimmune diabetes. *J Biol Chem* **288**: 36226–36235.
- 348 13. Coleman DL (1978) Obese and diabetes: two mutant genes causing diabetes-  
349 obesity syndromes in mice. *Diabetologia* **14**: 141–148.
- 350 14. Robbins RD, Tersey SA, Ogihara T, Gupta D, Farb TB, Ficorilli J, Bokvist K, Maier B,  
351 Mirmira RG Inhibition of deoxyhypusine synthase enhances islet {beta} cell function  
352 and survival in the setting of endoplasmic reticulum stress and type 2 diabetes. *J*  
353 *Biol Chem* **285**: 39943–39952.
- 354 15. Kilimnik G, Kim A, Jo J, Miller K, Hara M (2009) Quantification of pancreatic islet  
355 distribution in situ in mice. *Am J Physiol - Endocrinol Metab* **297**: E1331–E1338.
- 356 16. Steiner DJ, Kim A, Miller K, Hara M (2010) Pancreatic islet plasticity: Interspecies  
357 comparison of islet architecture and composition. *Islets* **2**: 135–145.
- 358 17. Wang X, Zielinski MC, Misawa R, Wen P, Wang T-Y, Wang C-Z, Witkowski P, Hara  
359 M (2013) Quantitative Analysis of Pancreatic Polypeptide Cell Distribution in the  
360 Human Pancreas. *PLoS ONE* **8**:.
- 361 18. Holzer P, Reichmann F, Farzi A (2012) Neuropeptide Y, peptide YY and pancreatic  
362 polypeptide in the gut-brain axis. *Neuropeptides* **46**: 261–274.



- 363 19. Brereton MF, Vergari E, Zhang Q, Clark A (2015) Alpha-, Delta- and PP-cells: Are  
364 They the Architectural Cornerstones of Islet Structure and Co-ordination? *J*  
365 *Histochem Cytochem Off J Histochem Soc* **63**: 575–591.
- 366 20. Arnes L, Hill JT, Gross S, Magnuson MA, Sussel L (2012) Ghrelin expression in the  
367 mouse pancreas defines a unique multipotent progenitor population. *PLoS One* **7**:  
368 e52026.
- 369 21. Grzesik WJ, Nadler JL, Machida Y, Nadler JL, Imai Y, Morris MA (2015) Expression  
370 pattern of 12-lipoxygenase in human islets with type 1 diabetes and type 2  
371 diabetes. *J Clin Endocrinol Metab* **100**: E387-395.
- 372 22. Bevec D, Jaksche H, Oft M, Wöhl T, Himmelspach M, Pacher A, Schebesta M,  
373 Koettnitz K, Dobrovnik M, Csonga R, et al. (1996) Inhibition of HIV-1 replication in  
374 lymphocytes by mutants of the Rev cofactor eIF-5A. *Science* **271**: 1858–1860.
- 375 23. Schlee M, Krug T, Gires O, Zeidler R, Hammerschmidt W, Mailhammer R, Laux G,  
376 Sauer G, Lovric J, Bornkamm GW (2004) Identification of Epstein-Barr virus (EBV)  
377 nuclear antigen 2 (EBNA2) target proteins by proteome analysis: activation of  
378 EBNA2 in conditionally immortalized B cells reflects early events after infection of  
379 primary B cells by EBV. *J Virol* **78**: 3941–3952.
- 380 24. Hatanaka M, Anderson-Baucum E, Lakhter A, Kono T, Maier B, Tersey SA,  
381 Tanizawa Y, Evans-Molina C, Mirmira RG, Sims EK (2017) Chronic high fat feeding  
382 restricts islet mRNA translation initiation independently of ER stress via DNA  
383 damage and p53 activation. *Sci Rep* **7**:
- 384 25. Postic C, Shiota M, Niswender KD, Jetton TL, Chen Y, Moates JM, Shelton KD,  
385 Lindner J, Cherrington AD, Magnuson MA (1999) Dual roles for glucokinase in  
386 glucose homeostasis as determined by liver and pancreatic beta cell-specific gene  
387 knock-outs using Cre recombinase. *J Biol Chem* **274**: 305–315.
- 388 26. Madisen L, Zwingman TA, Sunkin SM, Oh SW, Zariwala HA, Gu H, Ng LL, Palmiter  
389 RD, Hawrylycz MJ, Jones AR, et al. (2010) A robust and high-throughput Cre  
390 reporting and characterization system for the whole mouse brain. *Nat Neurosci* **13**:  
391 133–140.
- 392 27. Stull ND, Breite A, McCarthy R, Tersey SA, Mirmira RG (2012) Mouse Islet of  
393 Langerhans Isolation using a Combination of Purified Collagenase and Neutral  
394 Protease. *J Vis Exp JoVE*.
- 395 28. Mastracci TL, Anderson KR, Papizan JB, Sussel L (2013) Regulation of Neurod1  
396 contributes to the lineage potential of Neurogenin3+ endocrine precursor cells in  
397 the pancreas. *PLoS Genet* **9**: e1003278.
- 398 29. Campbell-Thompson M, Wasserfall C, Kaddis J, Albanese-O'Neill A, Staeva T,  
399 Nierras C, Moraski J, Rowe P, Gianani R, Eisenbarth G, et al. (2012) Network for  
400 Pancreatic Organ Donors with Diabetes (nPOD): developing a tissue biobank for  
401 type 1 diabetes. *Diabetes Metab Res Rev* **28**: 608–617.

402

403

404

405

406

407



408 **FIGURE LEGENDS**

409 **Figure 1 - Expression of hypusinated eIF5A (eIF5A<sup>Hyp</sup>) in mouse and human**  
410 **pancreatic islets.**

411 A Western blot from mouse and human pancreas tissue and isolated pancreatic islets.

412 B Western blot from FACS sorted mouse islet cell populations.

413 C, D Representative immunofluorescence images of mouse tissue demonstrating robust  
414 expression of eIF5A<sup>Hyp</sup> in PP-expressing cells.

415

416 **Figure 2 – The expression pattern of eIF5A<sup>Hyp</sup> in T2D and control pancreatic tissue.**

417 In controls (matched for age, gender and BMI) and T2D pancreas, we evaluated the co-  
418 expression of eIF5A<sup>Hyp</sup> with all islet hormones and found no overlap with insulin (A,B),  
419 glucagon (C,D), ghrelin (E,F) or somatostatin (G,H).

420

421 **Figure 3 - eIF5A<sup>Hyp</sup> is robustly expressed in the pancreatic polypeptide-expressing**  
422 **PP cells in the islet.**

423 A-D In both controls and T2D pancreas, co-expression of eIF5A<sup>Hyp</sup> with pancreatic  
424 polypeptide (PP) and chromograninA (ChgA) was observed.

425 E An expression pattern of eIF5A<sup>Hyp</sup> in the PP cells suggestive of localization to the ER  
426 was observed in cells in both controls and T2D pancreas.

427

428 **Figure 4 - eIF5A<sup>Hyp</sup> expression pattern in the spleen of control and T2D.**

429 eIF5A<sup>Hyp</sup> is expressed in immune cells in the spleen. We evaluated expression of

430 eIF5A<sup>Hyp</sup> in Pax5+ B cells, CD4+ T cells and CD8+ T cells in the spleens of donors with  
431 T2D and controls matched for age, gender and BMI. Most eIF5A<sup>Hyp</sup>+ cells co-expressed

432 Pax5+ (A,D); however, a select group of eIF5A<sup>Hyp</sup>+ cells expressed either CD4+ (B,E) or  
433 CD8+ (C,F).

434 **Figure 5 - Expression of eIF5A<sup>Hyp</sup> in the T1D pancreas.**

435 A-F Identical to the pattern identified in T2D and control tissues, high expression of  
436 eIF5A<sup>Hyp</sup> is observed in PP cells in the T1D, both auto-antibody positive (aAb+) and  
437 auto-antibody negative(aAb-), pancreas and controls (matched for age, gender, ethnicity  
438 and BMI).

439 G-I In all cases, these cells express the endocrine cell marker ChromograninA (ChgA).

440

441 **Figure 6 - Expression of eIF5A<sup>Hyp</sup> in spleen tissue from donors with T1D and**  
442 **matched control donors.**

443 We examined spleen tissue from persons with autoantibody positive (AAb+) and auto-  
444 antibody negative (AAb-) T1D, and corresponding controls matched for age, gender,  
445 ethnicity, and BMI. As observed in T2D and matched control spleen tissue, most  
446 eIF5A<sup>Hyp</sup>-expressing cells were Pax5+ (A-C); however, some eIF5A<sup>Hyp</sup>+ cells expressed  
447 either CD4+ (D-F) or CD8+ (G-I).

448

449

450

451

452

453

454

455

456

457

458

459 **Table 1 – Human donor pancreas and spleen tissue from T2D and matched controls.**  
 460

| <b>nPOD case #</b> | <b>Sample name</b> | <b>Age (years)</b> | <b>Gender (male/female)</b> | <b>Ethnicity</b> | <b>BMI</b> | <b>T2D (yes/no)</b> | <b>C-peptide (ng/mL)</b> | <b>HbA1c</b> |
|--------------------|--------------------|--------------------|-----------------------------|------------------|------------|---------------------|--------------------------|--------------|
| nPOD-6097          | F1-control         | 43.1               | female                      | Caucasian        | 36.4       | no                  | 16.76                    | 7.1          |
| nPOD-6102          | F2-control         | 45.1               | female                      | Caucasian        | 35.1       | no                  | 0.55                     | 6.1          |
| nPOD-6132          | F1-T2D             | 55.8               | female                      | Hispanic         | 44.6       | yes                 | 0.8                      | 9.1          |
| nPOD-6109          | F2-T2D             | 48.8               | female                      | Hispanic         | 32.5       | yes                 | <0.05                    | 8            |
| nPOD-6060          | M1-control         | 24                 | male                        | Caucasian        | 32.7       | no                  | 13.63                    | N/A          |
| nPOD-6091          | M2-control         | 27.1               | male                        | Caucasian        | 35.6       | no                  | 7.71                     | 6.3          |
| nPOD-6114          | M1-T2D             | 42.8               | male                        | Caucasian        | 31         | yes                 | 0.58                     | 7.8          |
| nPOD-6188          | M2-T2D             | 36.1               | male                        | Hispanic         | 30.6       | yes                 | 3.45                     | 7.2          |

461  
 462  
 463  
 464  
 465  
 466  
 467  
 468  
 469  
 470  
 471  
 472  
 473  
 474  
 475  
 476  
 477  
 478  
 479

480 **Table 2 – Human donor pancreas and spleen tissue from T1D and matched controls.**

481

| nPOD case # | Sample name    | Age (years) | Gender (male/female) | Ethnicity | BMI  | T1D (yes/no) | c-peptide | Auto Antibodies Detected      | Duration of disease (years) |
|-------------|----------------|-------------|----------------------|-----------|------|--------------|-----------|-------------------------------|-----------------------------|
| nPOD-6179   | 1-control      | 21.8        | female               | Caucasian | 20.7 | no           | 2.74      | N/A                           | N/A                         |
| nPOD-6224   | 1-AAb-negative | 21          | female               | Caucasian | 22.8 | yes          | <0.05     | negative                      | 1.5                         |
| nPOD-6070   | 1-AAb-positive | 22.6        | female               | Caucasian | 21.6 | yes          | <0.05     | mIAA+;1A-2A+                  | 7                           |
| nPOD-6034   | 2-control      | 32          | female               | Caucasian | 25.2 | no           | 3.15      | N/A                           | N/A                         |
| nPOD-6121   | 2-AAb-negative | 33.9        | female               | Caucasian | 18   | yes          | 0.24      | negative                      | 4                           |
| nPOD-6143   | 2-AAb-positive | 32.6        | female               | Caucasian | 26.1 | yes          | <0.05     | 1A-2A+;mIAA+                  | 7                           |
| nPOD-6229   | 3-control      | 31          | female               | Caucasian | 26.9 | no           | 6.23      | N/A                           | N/A                         |
| nPOD-6208   | 3-AAb-negative | 32          | female               | Caucasian | 23.4 | yes          | <0.05     | negative                      | 16                          |
| nPOD-6077   | 3-AAb-positive | 32.9        | female               | Caucasian | 22   | yes          | <0.05     | mIAA+                         | 18                          |
| nPOD-6015   | 4-control      | 39          | female               | Caucasian | 32.2 | no           | 1.99      | N/A                           | N/A                         |
| nPOD-6038   | 4-AAb-negative | 37.2        | female               | Caucasian | 30.9 | yes          | 0.2       | negative                      | 20                          |
| nPOD-6054   | 4-AAb-positive | 35.1        | female               | Caucasian | 30.4 | yes          | <0.05     | mIAA+                         | 30                          |
| nPOD-6055   | 5-control      | 27          | male                 | Caucasian | 22.7 | no           | 0.59      | N/A                           | N/A                         |
| nPOD-6041   | 5-AAb-negative | 26.3        | male                 | Caucasian | 28.4 | yes          | <0.05     | negative                      | 10                          |
| nPOD-6180   | 5-AAb-positive | 27.1        | male                 | Caucasian | 25.9 | yes          | <0.05     | GADA+;1A-2A+;<br>ZnT8A+;mIAA+ | 11                          |
| nPOD-6104   | 6-control      | 41          | male                 | Caucasian | 20.5 | no           | 20.55     | N/A                           | N/A                         |
| nPOD-6173   | 6-AAb-negative | 44.1        | male                 | Caucasian | 23.9 | yes          | <0.05     | negative                      | 15                          |
| nPOD-6141   | 6-AAb-positive | 36.7        | male                 | Caucasian | 26   | yes          | <0.05     | GADA+;1A-2A+;<br>ZnT8A+;mIAA+ | 28                          |

482

483

484

485

486

487

488  
489

**Table 3 – Human donor information for islet and acinar tissue preparations.**

|                                                                             | <b>Islet Preparation</b>                        | <b>Acinar Preparation</b>                         |
|-----------------------------------------------------------------------------|-------------------------------------------------|---------------------------------------------------|
| Unique identifier                                                           | SAMN11578698                                    | UNOS AGDB487                                      |
| Donor Age (years)                                                           | 57.0                                            | 24                                                |
| Donor Sex (M/F)                                                             | M                                               | M                                                 |
| Donor BMI (kg/m <sup>2</sup> )                                              | 25.8                                            | 31.7                                              |
| Donor HbA1c                                                                 | 5.7                                             | not tested                                        |
| Origin/source of islets                                                     | IIDP<br>(Integrated Islet Distribution Program) | CORE<br>(Center for Organ Recovery and Education) |
| Islet isolation center                                                      | The Scharp-Lacy Research Institute              | Pittsburgh (AHN)                                  |
| Donor history of diabetes? Yes/No                                           | No                                              | No                                                |
| <b>If Yes, complete the next two lines if this information is available</b> |                                                 |                                                   |
| Diabetes duration (years)                                                   | Not Applicable                                  | Not Applicable                                    |
| Glucose-lowering therapy at time of death                                   | Not Applicable                                  | Not Applicable                                    |

490  
491

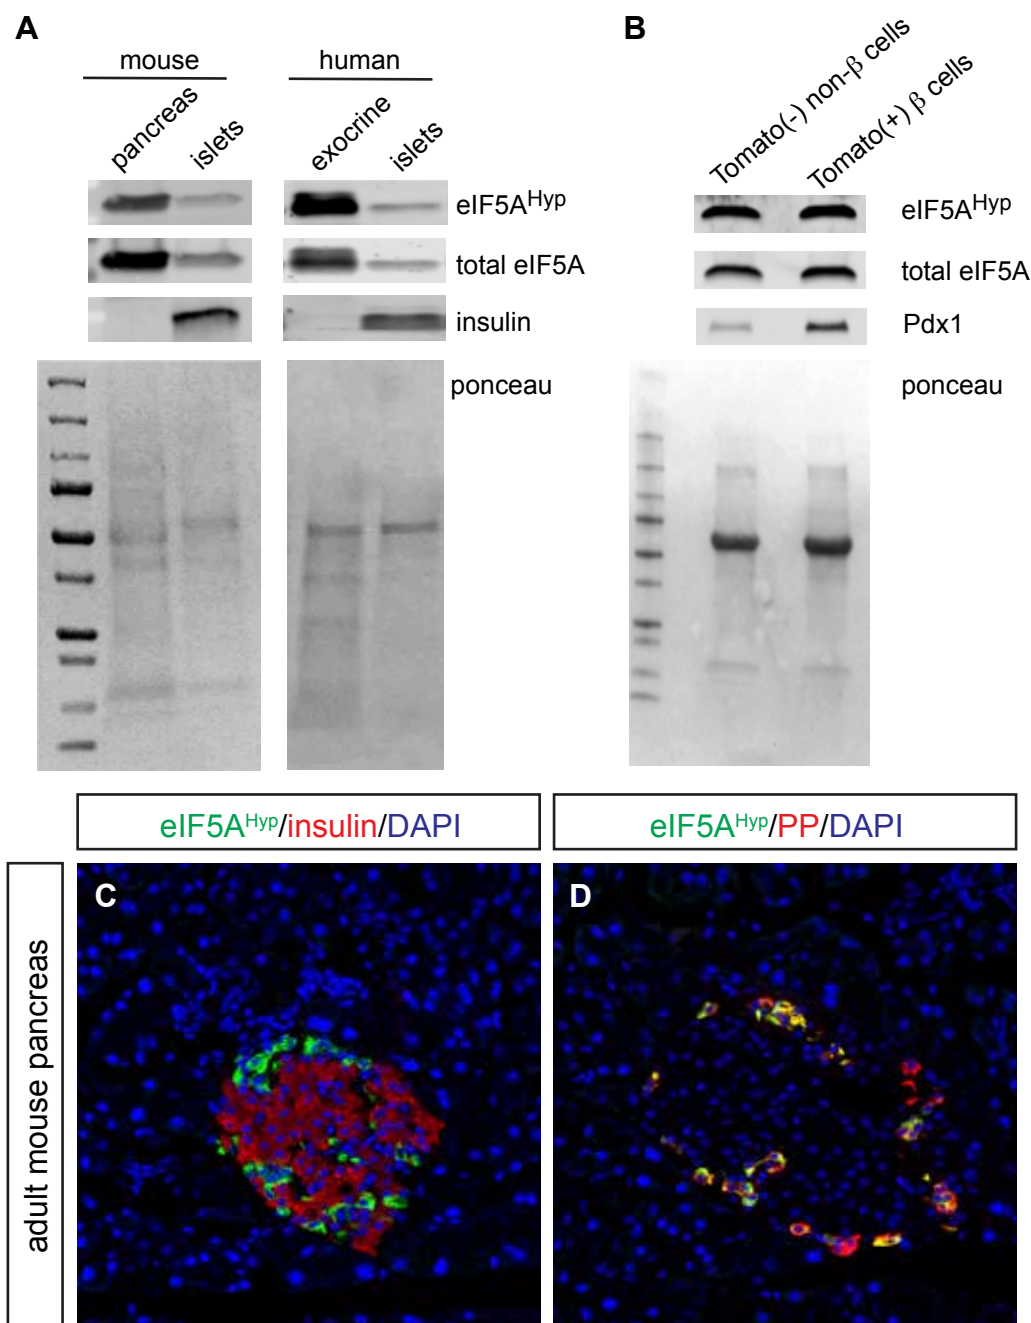

Figure 1 - Expression of hypusinated eIF5A (eIF5A<sup>Hyp</sup>) in mouse and human pancreatic islets.

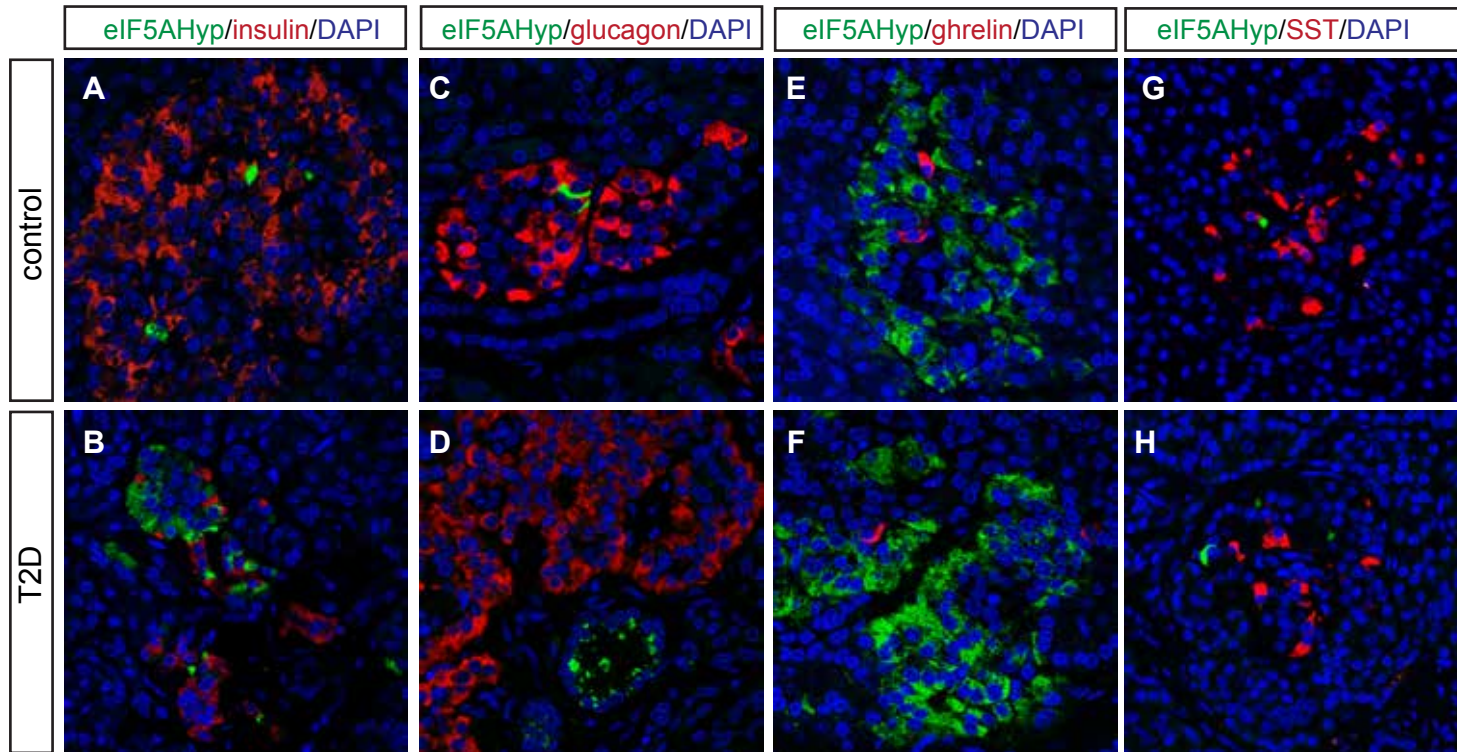

Figure 2 - The expression pattern of eIF5A<sup>Hyp</sup> in T2D and control pancreatic tissue.



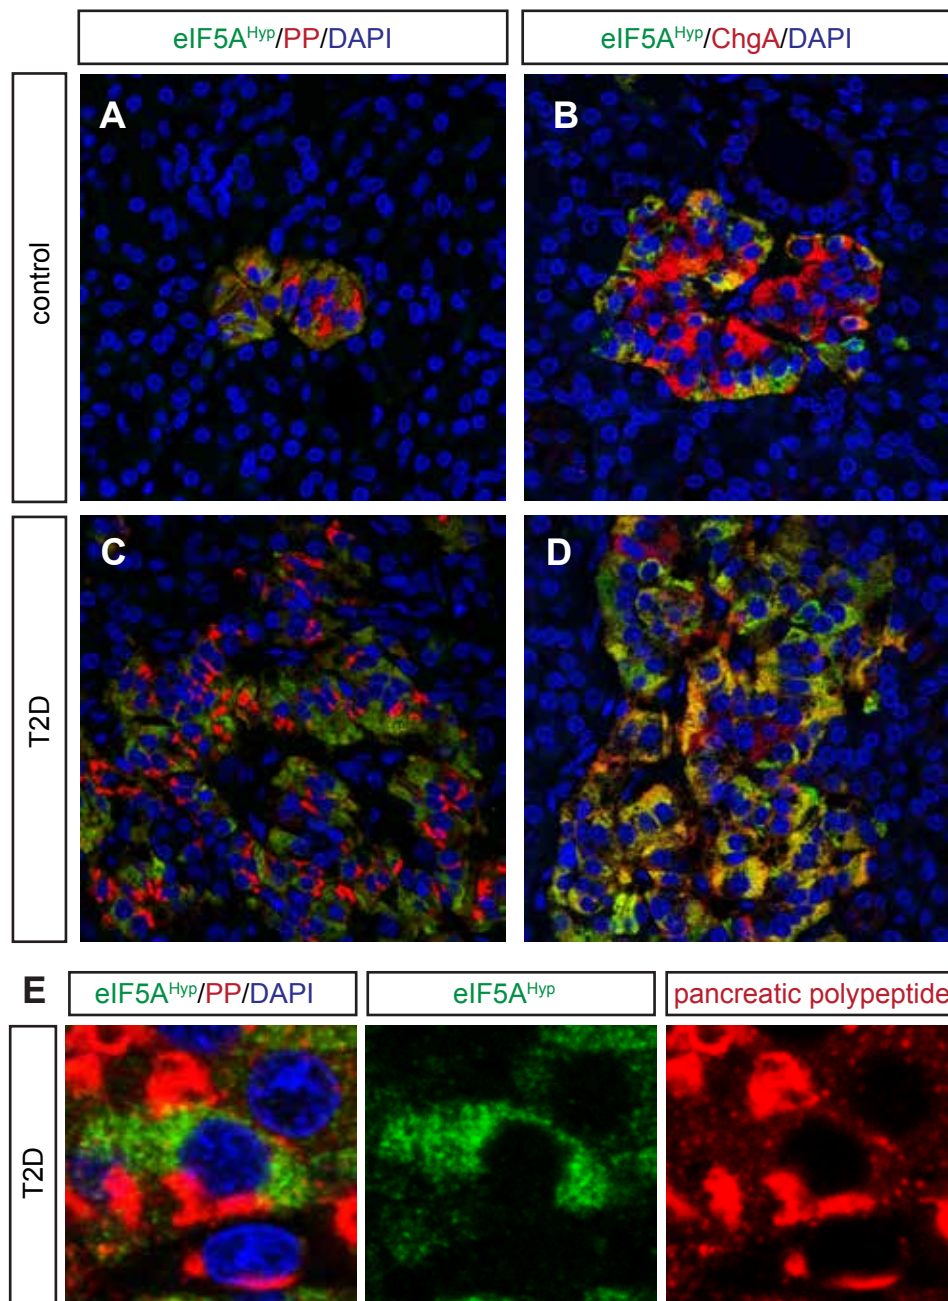

**Figure 3 - eIF5A<sup>Hyp</sup> is robustly expressed in the pancreatic polypeptide-expressing PP cells in the islet.**



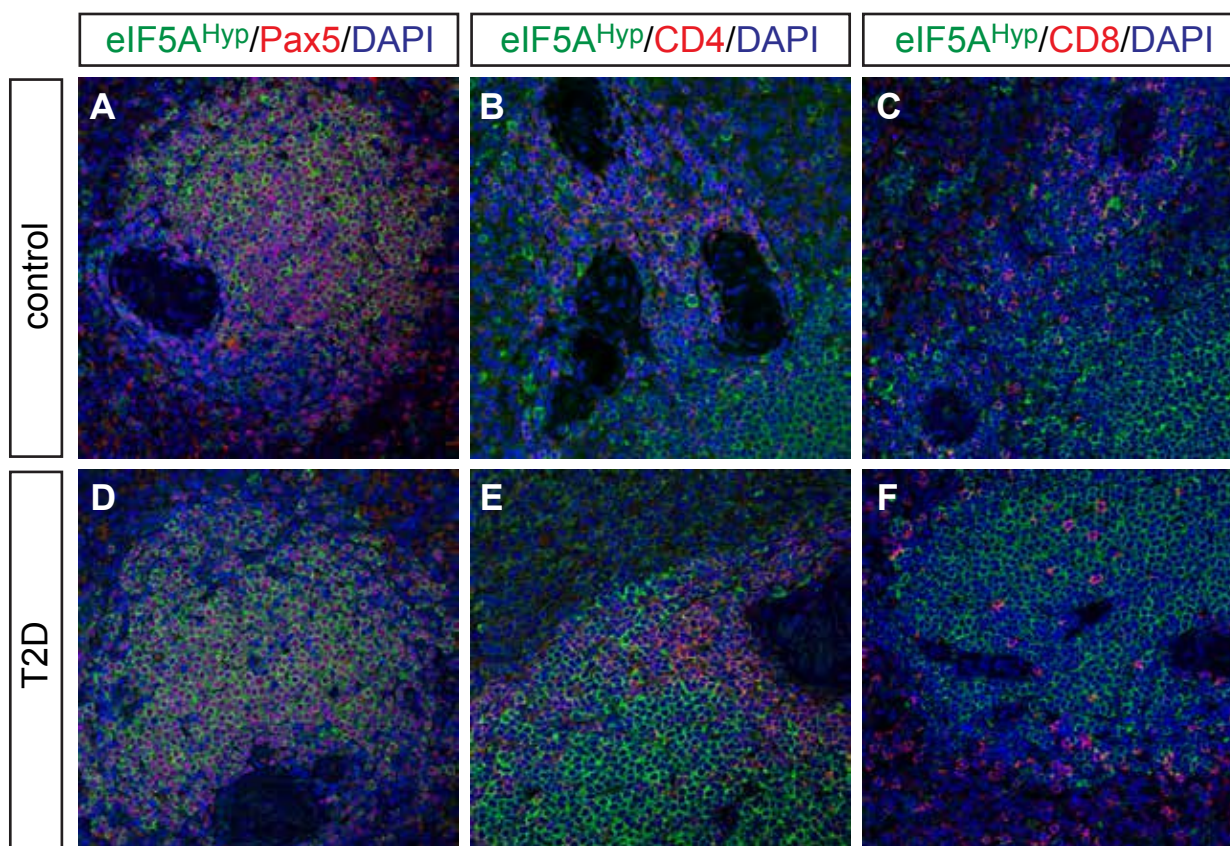

**Figure 4 - eIF5A<sup>Hyp</sup> expression pattern in the spleen of control and T2D.**

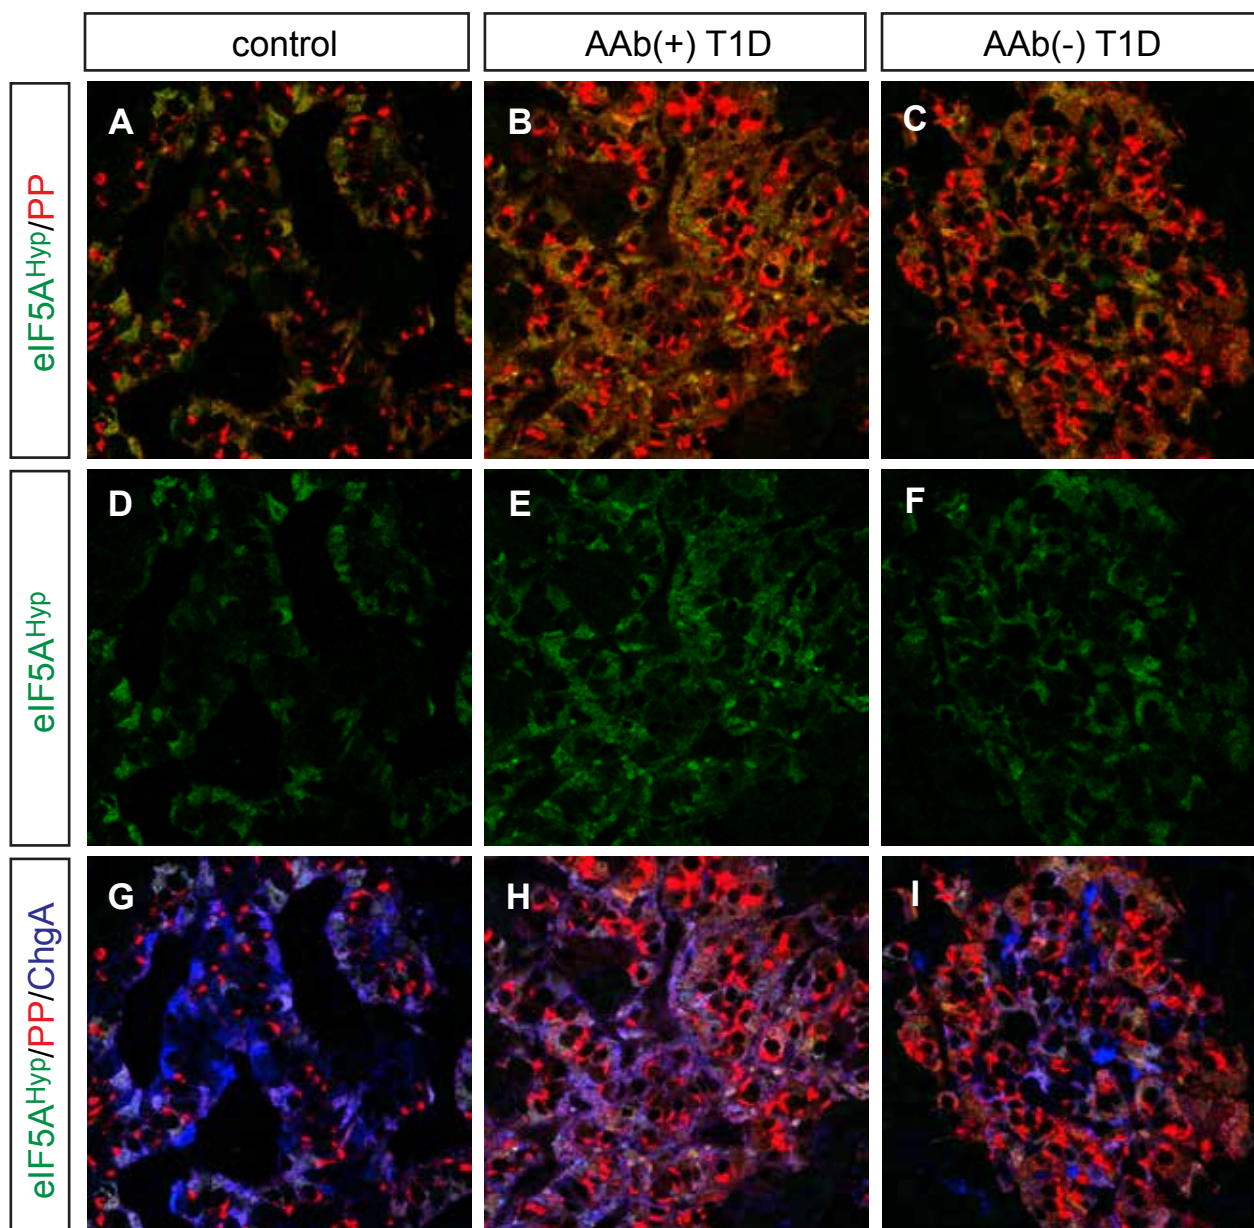

**Figure 5. Expression of eIF5A<sup>Hyp</sup> in the T1D pancreas.**



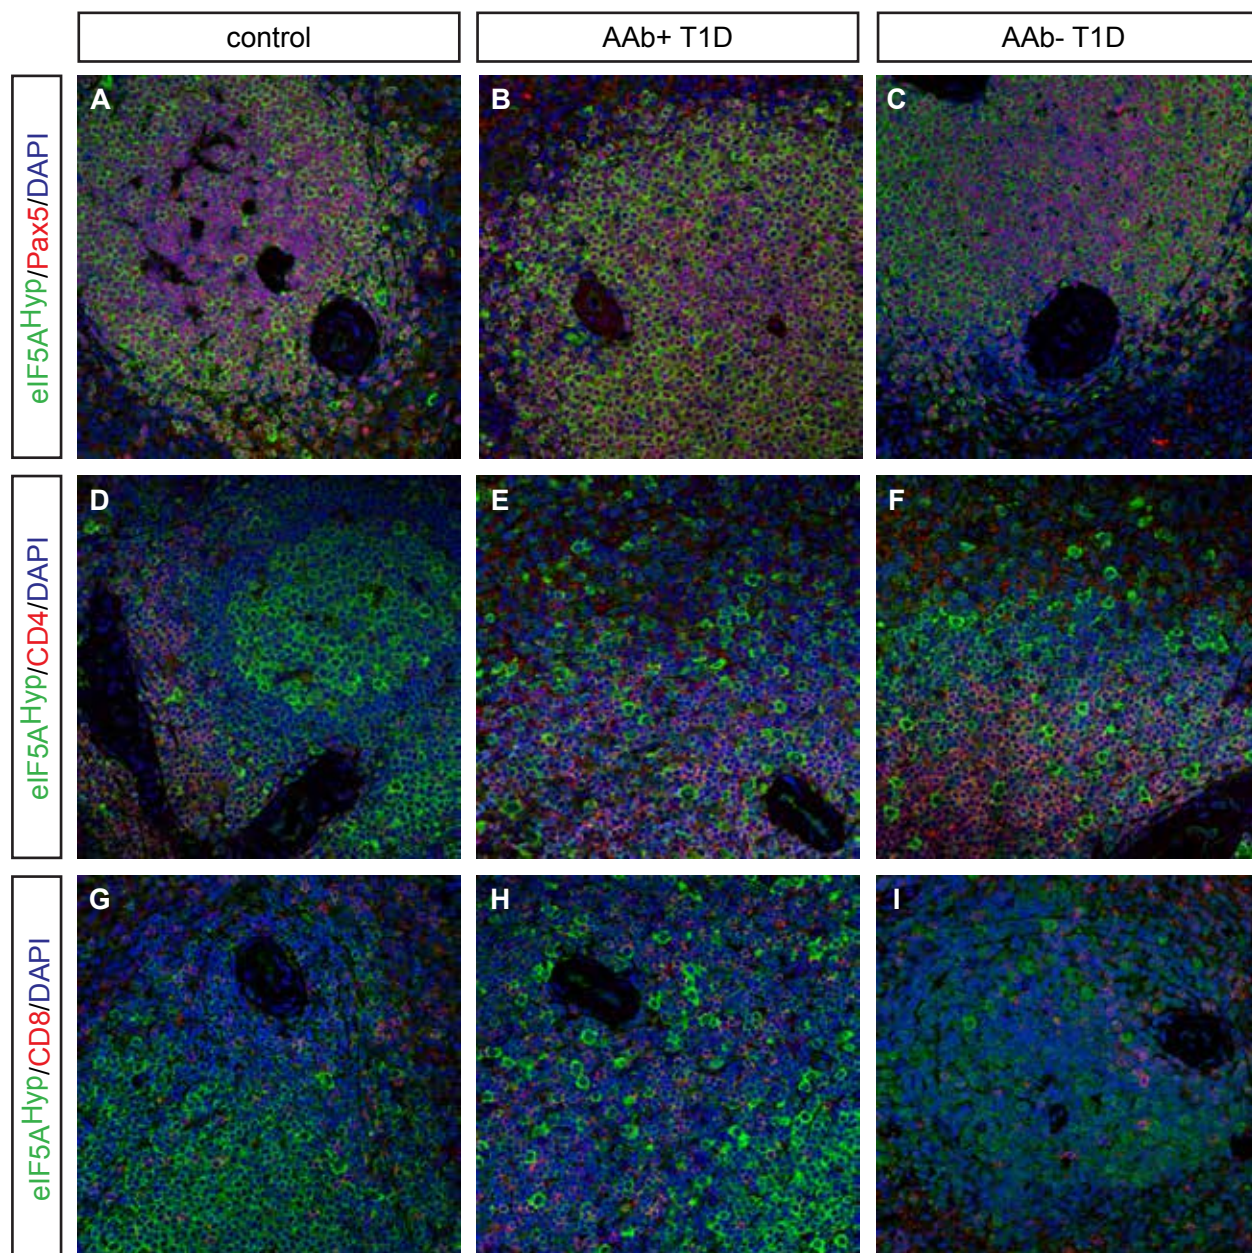

**Figure 6. Expression of eIF5A<sup>Hyp</sup> in the spleen tissue from donors with T1D and matched control donors.**
